# Supplementary material for: Doxorubicin and siRNA Co-Delivery System Based on Carbon Dots Inhibits Chemoresistance of Lung Cancer
Source: Research Square preprint supplement (doi:10.21203/rs.3.rs-153127/v1), 2021-01-27
Supplement: Supplementary file 1 [file 709a6ddc4a44f996873dee60.docx]

Table S1 Percentage of groups obtained from curve fitting the C1s and N1s peaks of nanodrug

|  | C1s | | | | N1s | | |
| --- | --- | --- | --- | --- | --- | --- | --- |
|  | C-C/C=C | C-N/C-OH | C=O | O-C=O | C=C-N | N-(C)3 | N-H |
| DOX | 66.9% | 11.1% | 17.1% | 4.9% | 56.1% | 26.5% | 17.4% |
| PEI | 79.2% | 12.1% | 4.5% | 4.2% | 48.8% | 40.0% | 11.2% |
| CD-PEI | 65.0% | 28.4% | 6.6% |  | 69.8% | 30.2% |  |
| CD-PEI-DOX | 45.5% | 33.8% | 12.8% | 7.9% | 65.7% | 30.9% | 3.4% |
| CD-PEI-DOX-siNC | 63.9% | 28.0% | 3.3% | 4.8% | 74.0% | 26.0% |  |
| CD-PEI-DOX-siMRP1 | 78.4% | 16.4% | 2.7% | 2.5% | 80.5% | 19.5% |  |
